# Supplementary material
Source: Springer Nature journal article supplement (https://www.springermedizin.de/resource/supplementary/12936_2011_2143_MOESM2_ESM.pdf/9542622)

Y detector IgG

• biotin

☆ streptavidin

○ peroxidase

● *Pf*HRP2

Y capture IgM

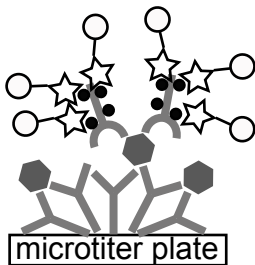

Supplement: MOESM2 [file 9542622]
